# Supplementary material
Source: PubMed Central journal article supplement (PMC3198486)
Supplement: supp_10-1166_Online_Supplement.pdf [file supp_10-1166_Online_Supplement.pdf]

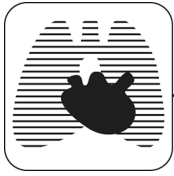

## Delay in Recognition of Pulmonary Arterial Hypertension

### Factors Identified From the REVEAL Registry

*Lynette M. Brown, MD, PhD, FCCP; Hubert Chen, MD, FCCP; Scott Halpern, MD, PhD; Darren Taichman, MD, PhD, FCCP; Michael D. McGoon, MD, FCCP; Harrison W. Farber, MD, FCCP; Adaani E. Frost, MD, FCCP; Theodore G. Liou, MD, FCCP; Michelle Turner, MS; Kathy Feldkircher, PhD; Dave P. Miller, MS; and C. Gregory Elliott, MD, FCCP*

#### e-Appendix 1.

**Background.** The hemodynamic criteria necessary for enrollment into the REVEAL Registry differed from those conventionally required for a diagnosis of PAH.<sup>1,2</sup> A mean PAP >25 mm Hg (>30 mm Hg with exercise) and a PVR  $\geq 3$  Wood units were compulsory. However, the PCWP and LVEDP requirements were liberalized to include patients with values >15 to  $\leq 18$  mm Hg. This approach reflects current practice whereby clinicians treat some patients for PAH due to convincing clinical criteria despite a somewhat elevated PCWP or LVEDP. Here we present the analyses of the adult (age  $\geq 19$  years at diagnosis) REVEAL population including patients with PCWP >15 mm Hg.

#### References

- 1 Badesch DB, Raskob GE, Elliott CG, et al. Pulmonary Arterial Hypertension: Baseline Characteristics From the REVEAL Registry. *Chest*. 2009
- 2 McGoon MD, Krichman A, Farber HW, et al. Design of the REVEAL registry for US patients with pulmonary arterial hypertension. *Mayo Clin Proc*. 2008;83(8):923-931.

*Online supplements are not copyedited prior to posting.*



### e-Appendix 2.

#### **REVEAL Sites – IRB/IRB #**

University of Colorado HSC (Colorado Multiple IRB, 06-0235)  
Columbia University (CUMC IRB, AAAC0789)  
MAYO Clinic-Jackson (MAYO Clinic IRB, 06-002271 00)  
Washington University (Washington University Human Research Protection Office (HRPO), 06-0753)  
University of Minnesota Medical Center (University of Minnesota Research Subjects' Protection Programs IRB, 0607M89066)  
Midwest Heart Foundation (Western IRB, 20060231)  
Children's Research Institute at Ohio State (Nationwide Children's IRB, 06-00411)  
Ohio State University (Biomedical Institutional Review Board, 2006H0177)  
Cleveland Clinic Foundation (Cleveland Clinic Foundation IRB, 06-259)  
Intermountain Medical Center and the University of Utah (Intermountain Healthcare IRB, # 1009009)  
Boston University School of Medicine (Western IRB, 1081775)  
MAYO Clinic College of Medicine, Rochester (MAYO Clinic IRB, 06-00227100)  
Baylor College of Medicine (Baylor College of Medicine IRB, H-19065)  
University of Chicago Hospitals (The University of Chicago IRB, 14917B)  
Georgia's Health Sciences University (Human Assurance Committee(HAC), 06-05-288)  
Virginia Commonwealth University (Western IRB, 1090150)  
University of Iowa Hospitals & Clinics (The University of Iowa IRB, #200603714)  
Johns Hopkins Medical Center (Western IRB, 1078595)  
Medical University of South Carolina (Office of Research Integrity (ORI) Medical University of South Carolina IRB, 16617)  
Tufts-New England Medical Center (Tufts Health Sciences Campus IRB, 7929)  
Children's Hospital Department of Cardiology (Colorado Multiple IRB, 06-0500)  
Rhode Island Hospital (Rhode Island Hospital IRB, 4075-06)  
University Texas Health Science Center (University of Texas EIRB, HSC 20070383H)  
Texas Children's Hospital (Baylor College of Medicine IRB, H-19569)  
Legacy Clinic Northwest (1. Oregon Health & Science University, 00002436; 2. Western IRB, 1099977)  
University of Pittsburgh School of Medicine (Western IRB, 1077291)  
Kentuckiana Pulmonary Associates (Western IRB, 1086454)  
UCSF Medical Center (UCSF Committee on Human Research, H46460-29039-01)  
Children's Hospital at Vanderbilt (Vanderbilt University IRB, 061152)  
University of Florida (Western IRB, 1097909)  
Allegheny General Hospital (Allegheny General Hospital IRB, RC -4088)  
Inova Heart and Vascular Institute (Western IRB, 1079519)  
LA Biomedical Research Institute at Harbor-UCLA (LABioMed, 12722-01)  
University of Maryland School of Medicine (University of Maryland For Human Subject Research IRB, H-28017)  
Vanderbilt University Medical Center (Vanderbilt University IRB, 070020)  
UCLA Medical Center (UCLA IRB, 06-06-118-02A)  
Wayne University (Wayne State University Human Investigation Committee, 064606MP4E)  
University Hospital of Cleveland (University Hospitals IRB, #07-06-28)  
VA Greater Los Angeles Health System (Department of Veterans Affairs IRB, PCC2008-11178)  
Beth Israel Medical Center (Beth Israel IRB, #013-08)

*Online supplements are not copyedited prior to posting.*

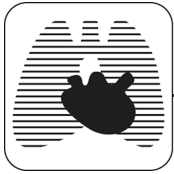

Penn Lung Center at Penn Presbyterian Medical Center (University of Pennsylvania IRB, 804760)  
University of Alabama at Birmingham (Western IRB, 1078385)  
North Shore University-LIJ Medical Center (BioMedical Research Alliance of New York, 06-02-83-03)  
Duke University Medical Center (Duke University Health System IRB, 8650-06-6R0DB)  
UCSD Medical Center (UCSD Human Research Protection Program, #060466)  
St. Luke's Medical Center –Aurora (Aurora Health Care RSPP, L-06-74E)  
Brigham and Women's Hospital Pulmonary Vascular Disease Program (Partners Human Research Committee, #2006P00088411)  
Temple Lung Center (Temple Lung Center, #10127)  
University Rochester Medical Center (Strong Health University of Rochester Research Subject Review Board, RSRB00014458)  
Spectrum Health Hospitals (Spectrum Health Research IRB, 2006-108)  
Seattle Children's (Seattle Children's IRB, 12224)  
Stanford University Medical Center (Stanford University, 96981 (eProtocol 5359))

*Online supplements are not copyedited prior to posting.*

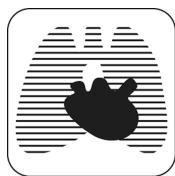**e-Table 1.** PAH Subgroup According to Time to Disease Recognition

| PAH Subgroup                                | ≤2 Years<br>(n = 2037) | >2 Years<br>(n = 553) | P Value <sup>†</sup> |
|---------------------------------------------|------------------------|-----------------------|----------------------|
| <b>Idiopathic PAH (IPAH)*</b>               | 946 (46.4)             | 248 (44.8)            | Reference            |
| <b>Associated with PAH (APAH)*</b>          |                        |                       |                      |
| Collagen vascular disease                   | 498 (24.4)             | 157 (28.4)            | 0.11                 |
| Congenital heart disease                    | 191 (9.4)              | 55 (9.9)              | 0.58                 |
| Portal hypertension                         | 114 (5.6)              | 24 (4.3)              | 0.35                 |
| Drugs and toxins                            | 108 (5.3)              | 27 (4.9)              | 0.83                 |
| HIV                                         | 46 (2.3)               | 3 (0.5)               | 0.010 <sup>‡</sup>   |
| Other APAH <sup>§</sup>                     | 69 (3.4)               | 27 (4.9)              | 0.091                |
| <b>Familial PAH (FPAH)*</b>                 | 55 (2.7)               | 9 (1.6)               | 0.19                 |
| <b>Pulmonary veno-occlusive disease*</b>    | 8 (0.4)                | 3 (0.5)               | 0.71 <sup>‡</sup>    |
| <b>Pulmonary capillary hemangiomatosis*</b> | 2 (0.1)                | 0 (0.0)               | >0.99 <sup>‡</sup>   |

Note: Of the final study population of 2733 patients, a total of 2590 had a PAH subgroup assigned at the time of diagnostic right-sided heart catheterization.

\*Values are given as No. (%); †Unless otherwise stated, *P* values were obtained from  $\chi^2$  test evaluating the equality of proportions of the select category vs the IPAH reference group; ‡*P* value was obtained from Fisher's Exact Test evaluating the equality of the proportions of the select category vs the IPAH reference group; §Other APAH (2003 Venice classifications): thyroid disorders, glycogen storage disease, Gaucher's disease, hereditary hemorrhagic telangiectasia, hemoglobinopathies, myeloproliferative disorders, and splenectomy.

**e-Table 2.** Patient Demographic Characteristics According to Time to Disease Recognition

| Characteristic                      | ≤2 Years<br>(n = 2149) | >2 Years<br>(n = 584) | P Value <sup>†</sup> |
|-------------------------------------|------------------------|-----------------------|----------------------|
| <b>Age at initial symptoms (y)*</b> |                        |                       |                      |
| <36                                 | 457 (21.3)             | 174 (29.8)            | <0.001               |
| 36 to <46                           | 491 (22.8)             | 125 (21.4)            | 0.017                |
| 46 to <56                           | 536 (24.9)             | 125 (21.4)            | 0.057                |
| 56 to <65                           | 346 (16.1)             | 107 (18.3)            | <0.001               |
| ≥65                                 | 319 (14.8)             | 53 (9.1)              | Reference            |
| <b>Sex*</b>                         |                        |                       |                      |
| Male                                | 456 (21.2)             | 117 (20.0)            | 0.53 <sup>‡</sup>    |
| Female                              | 1693 (78.8)            | 467 (80.0)            |                      |
| <b>Race/ethnicity*</b>              |                        |                       |                      |
| White                               | 1564 (72.8)            | 435 (74.5)            | Reference            |
| Black                               | 267 (12.4)             | 76 (13.0)             | 0.87                 |
| Hispanic                            | 183 (8.5)              | 46 (7.9)              | 0.56                 |
| Asian or Pacific Islander           | 69 (3.2)               | 17 (2.9)              | 0.66                 |
| Native American or Native Alaskan   | 15 (0.7)               | 0 (0.0)               | 0.052 <sup>§</sup>   |
| Other                               | 16 (0.7)               | 5 (0.9)               | 0.82                 |
| Unknown                             | 35 (1.6)               | 5 (0.9)               | 0.16                 |
| <b>Geographic region*</b>           |                        |                       |                      |
| Northeast                           | 497 (23.1)             | 126 (21.6)            | Reference            |
| Midwest                             | 491 (22.8)             | 119 (20.4)            | 0.75                 |
| South                               | 617 (28.7)             | 175 (30.0)            | 0.39                 |
| West                                | 544 (25.3)             | 164 (28.1)            | 0.19                 |

Note: Numbers may not sum to the total number of patients within each variable due to missing data.

\*Values are given as No. (%); †Unless otherwise stated, P values were obtained from  $\chi^2$  test evaluating the equality of proportions of the select category vs the reference group; ‡P value was obtained from overall  $\chi^2$  test; §P value was obtained from Fisher's Exact Test evaluating the equality of proportions of the select category vs the reference group.

*Online supplements are not copyedited prior to posting.*

**e-Table 3.** Patient Comorbid Conditions and Presenting Symptoms; Physician Specialty Consulted at Symptom Onset According to Time to Disease Recognition

| Characteristic                                         | ≤2 Years<br>(n = 2149) | >2 Years<br>(n = 584) | P Value <sup>†</sup> |
|--------------------------------------------------------|------------------------|-----------------------|----------------------|
| <b>Comorbid conditions at diagnosis of PAH*</b>        |                        |                       |                      |
| History of obstructive airways disease <sup>§</sup>    | 408 (19.5)             | 170 (29.7)            | <0.001               |
| History of thromboembolic disease                      | 194 (9.3)              | 71 (12.5)             | 0.022                |
| Sleep apnea                                            | 428 (21.2)             | 161 (28.9)            | <0.001               |
| Obesity (BMI ≥30 kg/m <sup>2</sup> )                   | 594 (33.2)             | 187 (37.9)            | 0.052                |
| Diabetes                                               | 257 (12.2)             | 85 (14.9)             | 0.089                |
| Cancer (excluding skin cancer)                         | 140 (6.7)              | 27 (4.7)              | 0.092                |
| <b>Presenting symptom(s) attributable to PAH*</b>      |                        |                       |                      |
| Abdominal distention                                   | 90 (4.2)               | 16 (2.7)              | 0.11                 |
| Chest pain/discomfort                                  | 467 (21.7)             | 119 (20.4)            | 0.48                 |
| Cough                                                  | 296 (13.8)             | 88 (15.1)             | 0.42                 |
| Dizziness/lightheadedness                              | 318 (14.8)             | 96 (16.4)             | 0.33                 |
| Dyspnea at rest                                        | 244 (11.4)             | 53 (9.1)              | 0.12                 |
| Dyspnea on exertion                                    | 1842 (85.7)            | 501 (85.8)            | 0.96                 |
| Edema                                                  | 483 (22.5)             | 104 (17.8)            | 0.015                |
| Fatigue                                                | 574 (26.7)             | 158 (27.1)            | 0.87                 |
| Presyncope/syncope                                     | 349 (16.2)             | 105 (18.0)            | 0.32                 |
| Raynaud's phenomenon                                   | 157 (7.3)              | 57 (9.8)              | 0.050                |
| Palpitations                                           | 274 (12.8)             | 69 (11.8)             | 0.55                 |
| <b>Physician specialty consulted at symptom onset*</b> |                        |                       |                      |
| Cardiologist                                           | 606 (28.2)             | 140 (24.0)            | 0.36 <sup>‡</sup>    |
| Pulmonologist                                          | 493 (23.0)             | 129 (22.1)            | Reference            |
| Internist                                              | 287 (13.4)             | 81 (13.9)             | 0.64 <sup>‡</sup>    |
| Rheumatologist                                         | 73 (3.4)               | 30 (5.1)              | 0.057 <sup>‡</sup>   |

*Online supplements are not copyedited prior to posting.*

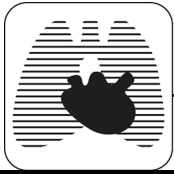

---

|         |            |            |                   |
|---------|------------|------------|-------------------|
| Other   | 271 (12.6) | 68 (11.6)  | 0.80 <sup>‡</sup> |
| Unknown | 417 (19.4) | 136 (23.3) | 0.11 <sup>‡</sup> |

---

BMI, body mass index; PAH, pulmonary arterial hypertension.

Note: Numbers may not sum to the total number of patients within each variable due to missing data.

\*Values are given as No. (%); †Unless otherwise stated,  $P$  values were obtained from overall  $\chi^2$  test; ‡ $P$  value was obtained from  $\chi^2$  test evaluating the equality of proportions of the select category vs the reference group; §History of obstructive airways disease was defined as having a history of obstructive lung disease and/or reactive airway disease.

*Online supplements are not copyedited prior to posting.*

**e-Table 4.** Patient Functional Classification, Exercise Tolerance, and RHC Variables According to Time to Disease Recognition

| Characteristic                                       | ≤2 Years<br>(n = 2149) | >2 Years<br>(n = 584) | P Value <sup>†</sup> |
|------------------------------------------------------|------------------------|-----------------------|----------------------|
| <b>NYHA/WHO functional class at PAH diagnosis*  </b> |                        |                       |                      |
| I                                                    | 64 (4.1)               | 7 (1.7)               | 0.022                |
| II                                                   | 349 (22.2)             | 97 (23.5)             | 0.79                 |
| III                                                  | 959 (61.1)             | 257 (62.4)            | Reference            |
| IV                                                   | 197 (12.6)             | 51 (12.4)             | 0.84                 |
| <b>6MWD at PAH diagnosis (meters)*§  </b>            |                        |                       |                      |
| <250                                                 | 155 (23.6)             | 52 (30.4)             | 0.012                |
| 250 to <410                                          | 341 (51.9)             | 68 (39.8)             | Reference            |
| ≥410                                                 | 161 (24.5)             | 51 (29.8)             | 0.026                |
| <b>mPAP (mm Hg)*</b>                                 |                        |                       |                      |
| <55                                                  | 1362 (63.4)            | 385 (65.9)            | 0.26 <sup>‡</sup>    |
| ≥55                                                  | 787 (36.6)             | 199 (34.1)            |                      |
| <b>mRAP (mm Hg)*</b>                                 |                        |                       |                      |
| <10                                                  | 1057 (54.1)            | 321 (61.0)            | 0.003                |
| 10 to <15                                            | 512 (26.2)             | 128 (24.3)            | 0.16                 |
| ≥15                                                  | 385 (19.7)             | 77 (14.6)             | Reference            |
| <b>PCWP or LVEDP (mm Hg)*</b>                        |                        |                       |                      |
| <12                                                  | 1409 (65.6)            | 358 (61.4)            | Reference            |
| 12 to <15                                            | 430 (20.0)             | 124 (21.3)            | 0.28                 |
| 15 to ≤18                                            | 308 (14.3)             | 101 (17.3)            | 0.048                |
| <b>Cardiac index (L/min × m<sup>2</sup>)*  </b>      |                        |                       |                      |
| <2                                                   | 627 (39.1)             | 132 (32.0)            | 0.007 <sup>‡</sup>   |
| ≥2                                                   | 975 (60.9)             | 281 (68.0)            |                      |
| <b>PVR (Wood units)*  </b>                           |                        |                       |                      |
| <10                                                  | 1072 (49.9)            | 328 (56.4)            | 0.006 <sup>‡</sup>   |

*Online supplements are not copyedited prior to posting.*





---

|                                     |             |            |                   |
|-------------------------------------|-------------|------------|-------------------|
| $\geq 10$                           | 1075 (50.1) | 254 (43.6) |                   |
| <b>Vasoreactivity</b> <sup>*¶</sup> |             |            |                   |
| Yes                                 | 107 (10.1)  | 30 (10.6)  | 0.84 <sup>‡</sup> |
| No                                  | 948 (89.9)  | 254 (89.4) |                   |

---

6MWD, 6-minute walking distance; LVEDP, left ventricular end-diastolic pressure; mPAP, mean pulmonary artery pressure; mRAP, mean right atrial pressure; NYHA, New York Heart Association; PAH, pulmonary arterial hypertension; PCWP, pulmonary capillary wedge pressure; PVR, pulmonary vascular resistance; RHC, right-sided heart catheterization; WHO, World Health Organization.

Note: Numbers may not sum to the total number of patients within each variable due to missing data.

\*Values are given as No. (%); †Unless otherwise stated,  $P$  values were obtained from  $\chi^2$  test evaluating the equality of proportions of the select category vs the reference group; ‡ $P$  value was obtained from overall  $\chi^2$  test;

§Categorization was based on the quartiles of the distribution; the second and third quartiles were combined;

¶Missing data: functional classification of 752 patients; 6MWD of 1905 patients, cardiac index of 718 patients, and PVR of 4 patients; ¶Defined as patients with a decrease in mPAP  $\geq 10$  mm Hg to a level  $< 40$  mm Hg without a decrease in cardiac output.

**e-Table 5.** Unadjusted and Adjusted Logistic Regression of Factors Associated With a Time to Disease Recognition >2 Years

| Risk Factor (units)                                 | Unadjusted OR<br>(95% CI) | Unadjusted<br>P Value* | Adjusted OR<br>(95% CI) <sup>†</sup> | Adjusted<br>P Value* |
|-----------------------------------------------------|---------------------------|------------------------|--------------------------------------|----------------------|
| <b>Age at initial symptoms (y)</b>                  |                           |                        |                                      |                      |
| <36                                                 | 2.29 (1.63–3.22)          | <0.001                 | 3.15 (2.13–4.66)                     | <0.001               |
| 36 to <46                                           | 1.53 (1.08–2.18)          | 0.017                  | 2.03 (1.36–3.03)                     | <0.001               |
| 46 to <56                                           | 1.40 (0.99–1.99)          | 0.058                  | 1.63 (1.10–2.42)                     | 0.016                |
| 56 to <65                                           | 1.86 (1.30–2.68)          | <0.001                 | 2.00 (1.34–3.05)                     | <0.001               |
| ≥65                                                 | Reference                 | Reference              | Reference                            | Reference            |
| <b>Comorbid conditions</b>                          |                           |                        |                                      |                      |
| History of obstructive airways disease <sup>‡</sup> | 1.74 (1.41–2.15)          | <0.001                 | 1.83 (1.45–2.33)                     | <0.001               |
| History of thromboembolic disease                   | 1.40 (1.05–1.87)          | 0.022                  | 1.45 (1.04–2.01)                     | 0.027                |
| Sleep apnea                                         | 1.51 (1.22–1.87)          | <0.001                 | 1.61 (1.26–2.05)                     | <0.001               |
| Obesity                                             | 1.23 (1.00–1.51)          | 0.052                  |                                      |                      |
| Diabetes                                            | 1.26 (0.96–1.64)          | 0.090                  |                                      |                      |
| Cancer (non-cutaneous)                              | 0.70 (0.46–1.06)          | 0.094                  |                                      |                      |
| <b>6MWD at PAH diagnosis (meters)</b>               |                           |                        |                                      |                      |
| <250                                                | 1.68 (1.12–2.53)          | 0.012                  |                                      |                      |
| 250 to < 410                                        | Reference                 | Reference              |                                      |                      |
| ≥410                                                | 1.59 (1.06–2.39)          | 0.026                  |                                      |                      |
| Missing                                             | 1.39 (1.05–1.84)          | 0.023                  |                                      |                      |
| <b>mRAP (mm Hg)</b>                                 |                           |                        |                                      |                      |
| <10                                                 | 1.52 (1.15–2.00)          | 0.003                  | 1.79 (1.30–2.46)                     | <0.001               |
| 10 to < 15                                          | 1.25 (0.91–1.71)          | 0.16                   | 1.35 (0.96–1.88)                     | 0.082                |
| ≥15                                                 | Reference                 | Reference              | Reference                            | Reference            |
| <b>Cardiac index (L/min × m<sup>2</sup>)</b>        |                           |                        |                                      |                      |
| <2                                                  | Reference                 | Reference              |                                      |                      |
| ≥2                                                  | 1.37 (1.09–1.72)          | 0.007                  |                                      |                      |
| Missing                                             | 1.48 (1.15–1.91)          | 0.002                  |                                      |                      |

*Online supplements are not copyedited prior to posting.*



### PCWP or LVEDP (mm Hg)

|           |                  |           |                  |           |
|-----------|------------------|-----------|------------------|-----------|
| <12       | Reference        | Reference | Reference        | Reference |
| 12 to <15 | 1.14 (0.90–1.43) | 0.28      | 1.25 (0.96–1.64) | 0.10      |
| 15 to ≤18 | 1.29 (1.00–1.66) | 0.048     | 1.62 (1.19–2.20) | 0.002     |

### PVR (Wood units)

|     |                  |           |                  |           |
|-----|------------------|-----------|------------------|-----------|
| <10 | 1.29 (1.08–1.56) | 0.006     | 1.26 (1.01–1.57) | 0.039     |
| ≥10 | Reference        | Reference | Reference        | Reference |

6MWD; 6-minute walking distance; CI, confidence interval; LVEDP, left ventricular end-diastolic pressure; mRAP, mean right atrial pressure; OR, odds ratio; PAH, pulmonary arterial hypertension; PCWP, pulmonary capillary wedge pressure; PVR, pulmonary vascular resistance.

\**P* values from Wald  $\chi^2$  test; †Adjusted model contains the following covariates: age at initial symptoms attributable to PAH, history of obstructive airways disease, sleep apnea, history of deep vein thrombosis and pulmonary embolism, mRAP, PCWP or LVEDP, and PVR; ‡History of obstructive airways disease was defined as having a history of obstructive lung disease and/or reactive airway disease.

*Online supplements are not copyedited prior to posting.*
